# Supplementary material for: Identifying TMEM127-deficient pheochromocytomas/paragangliomas via RET overexpression by immunohistochemistry
Source: Research Square preprint supplement (doi:10.21203/rs.3.rs-8553860/v1), 2026-01-20
Supplement: Supplementary file 1 [file 95e6ea324eeece0dd2a484dd.pdf]

## **Identifying tmem127-deficient pheochromocytomas/paragangliomas via RET overexpression by immunohistochemistry**

Cynthia Estrada-Zuniga, Rui Liang, Bethany Landry, Andrea Alvarez, Hector Gonzalez-Cantu, Viviane Nascimento da Conceição, Rolando Trevino, David Gius, Sylvia L. Asa, James Powers, Tamara Prodanov, Anand Vaidya, Rodrigo A. Toledo, J.P. Bayley, Debbie L Cohen, Arthur S. Tischler, Karel Pacak, Faqian Li, Patricia L. M. Dahia\*

\*corresponding author ([dahia@uthscsa.edu](mailto:dahia@uthscsa.edu))

## **Supplementary Figures**

## A Slide vs TMA in C1

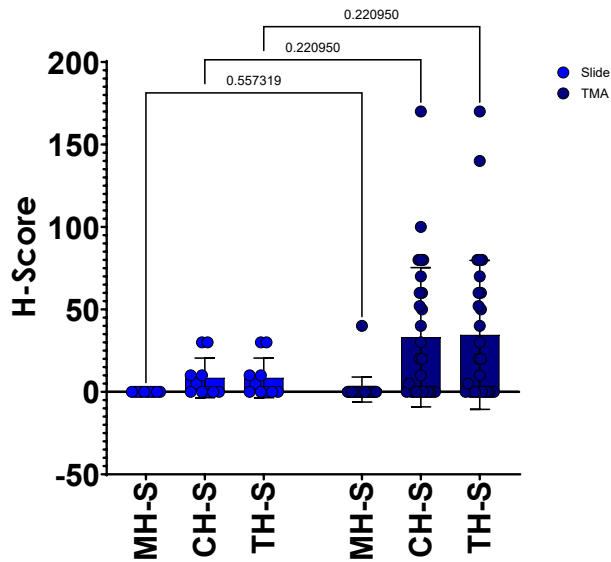

|      | Slide<br>(n=10) | TMA<br>(n=28) | Adjusted<br>p |
|------|-----------------|---------------|---------------|
| MH-S | 0±0             | 1.42±7.55     | 0.5573        |
| CH-S | 8.5±12.03       | 33.10±42.22   | 0.2209        |
| TH-S | 8.5±12.03       | 34.53±45.14   | 0.2209        |

## B Slide vs TMA in C2

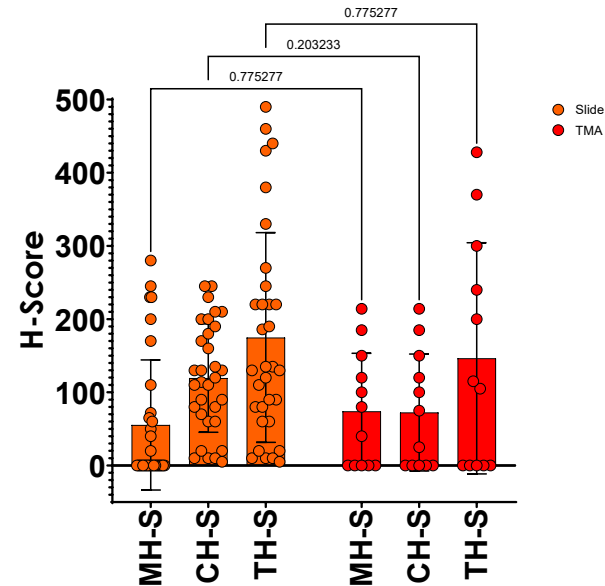

|      | Slide<br>(n=32) | TMA<br>(n=12) | Adjusted<br>p |
|------|-----------------|---------------|---------------|
| MH-S | 55.37±88.82     | 74.08±79.23   | 0.7752        |
| CH-S | 119.50±74.03    | 72.41±79.91   | 0.2032        |
| TH-S | 174.87±143.25   | 146.50±157.93 | 0.7752        |

**Supplementary Figure 1.** Comparison between RET H-scores in individual slides versus TMA sections. **A)** Samples belonging to molecular cluster 1 (C1); **B)** Samples belonging to molecular cluster 2 (C2). Membrane, cytoplasm, and total (MH-S, CH-S, and T-HS) scores are as indicated. Statistical significance was assessed using one-way ANOVA.

**A**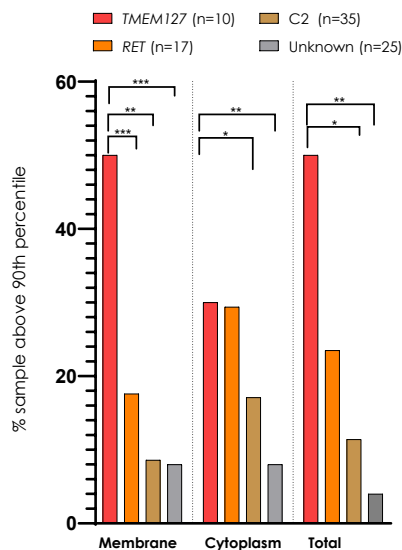**B**

| Comparison groups                      | Adjusted p value |         |         |
|----------------------------------------|------------------|---------|---------|
|                                        | MH-S             | CH-S    | TH-S    |
| <i>TMEM127 vs SDH (SDHA+SDHB+SDHD)</i> | <0.0001          | 0.0309  | <0.0001 |
| <i>TMEM127 vs. FH</i>                  | <0.0001          | 0.0249  | <0.0001 |
| <i>TMEM127 vs. EPAS1</i>               | <0.0001          | 0.0009  | <0.0001 |
| <i>TMEM127 vs. RET, RET::GRB2</i>      | 0.0312           | >0.9999 | 0.7521  |
| <i>TMEM127 vs. HRAS</i>                | 0.0393           | 0.1966  | 0.0194  |
| <i>TMEM127 vs. MAX</i>                 | <0.0001          | 0.0506  | <0.0001 |
| <i>TMEM127 vs. NF1</i>                 | 0.0003           | 0.1959  | 0.0013  |
| <i>TMEM127 vs. CSDE1 +PIK3CA</i>       | 0.9477           | 0.9933  | 0.9329  |
| <i>TMEM127 vs. UBTX::MAML3</i>         | 0.3234           | 0.5266  | 0.1882  |
| <i>TMEM127 vs. Unknown</i>             | 0.0001           | 0.1346  | 0.0005  |

**Supplementary Figure 2. A)** Percentage of samples displaying RET IHC H-Scores above the 90th percentile in each of the indicated groups: tumors with TMEM127 pathogenic variants (n=10, including a sample previously reported in ref<sup>23</sup>); the remaining groups are the same as shown in Figure 2D: tumors with RET pathogenic variants, tumors belonging to Cluster 2 (C2, kinase signaling, except for TMEM127-mutant tumors, and samples with unknown genotype (including RET VUS and TMEM127 VUS), distribution of membrane, cytoplasm and total staining. P values were calculated by one-way ANOVA. Comparisons with TMEM127 group are indicated by (\*). Other comparisons were not statistically significant; **B)** Statistical analysis of pairwise genotype comparisons of RET immunohistochemistry scores for membrane (MH-S), cytoplasm (CH-S) or total (TH-S) H-scores using Tukey's multiple comparisons test (related to Figure 2C and Table 3);

**A**

c.314T&gt;G, p.L105R

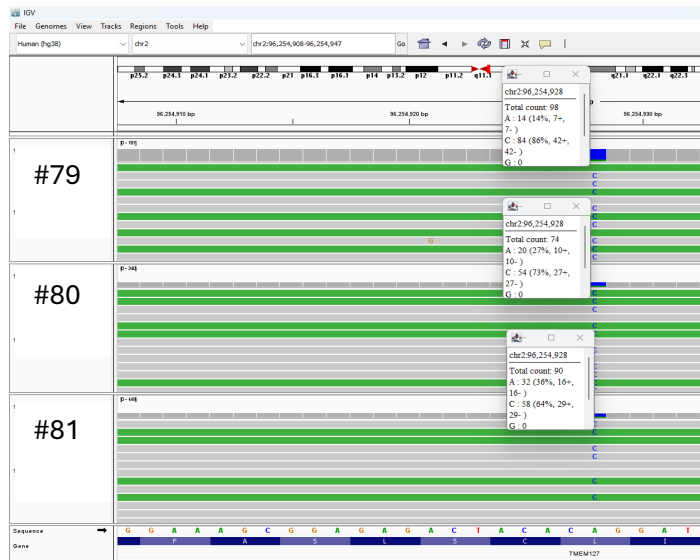**B**

c.53C&gt;T, p.P18L

Reference

Tumor

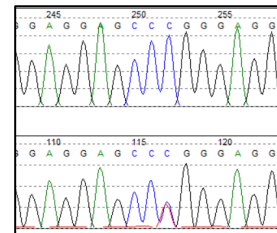**C**

c.523G&gt;T, p.V175F

Reference

Tumor

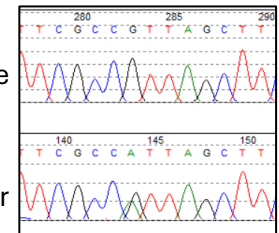

**Supplementary Figure 3.** Loss of heterozygosity analysis of tumors carrying the indicated *TMEM127* variants. **A)** Variant classified as VUS, Next-generation sequencing (IGV) of three tumors from the same patient (#79=left pheochromocytoma, #80 and #81 are two separate tissue blocks from the right pheochromocytoma). The variant nucleotide is detected at a frequency of 86%, 73%, 64%, in these three samples, respectively. **B,** Variant classified as benign, **C)** Variant classified as VUS. Sanger sequencing of the B and C tumors relative to the reference sequence, arrow indicates the variant region showing heterozygosity.

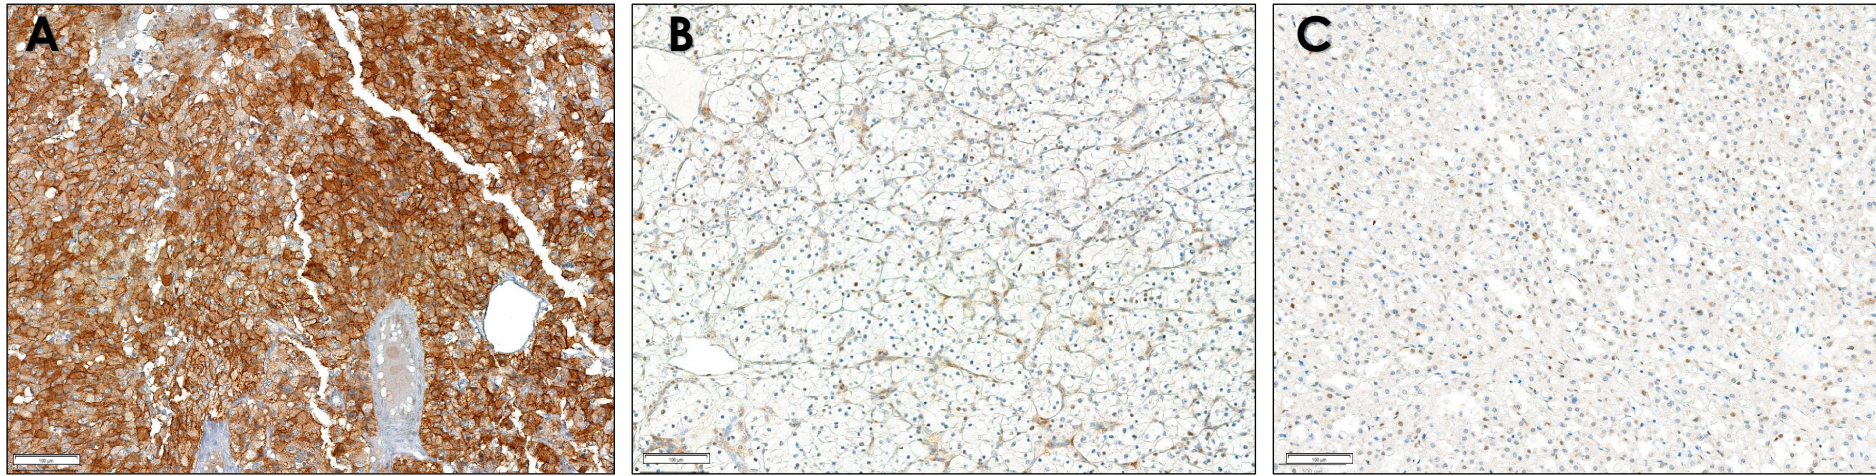

**Supplementary Figure 4. A, B)** RET immunohistochemistry of a pheochromocytoma (A) and renal cell carcinoma (B) from the same individual carrying a *TMEM127* pathogenic variant; **C)** Renal cell carcinoma from an unrelated patient (carrying a pathogenic *SDHB* variant). Scale bars are 100µm

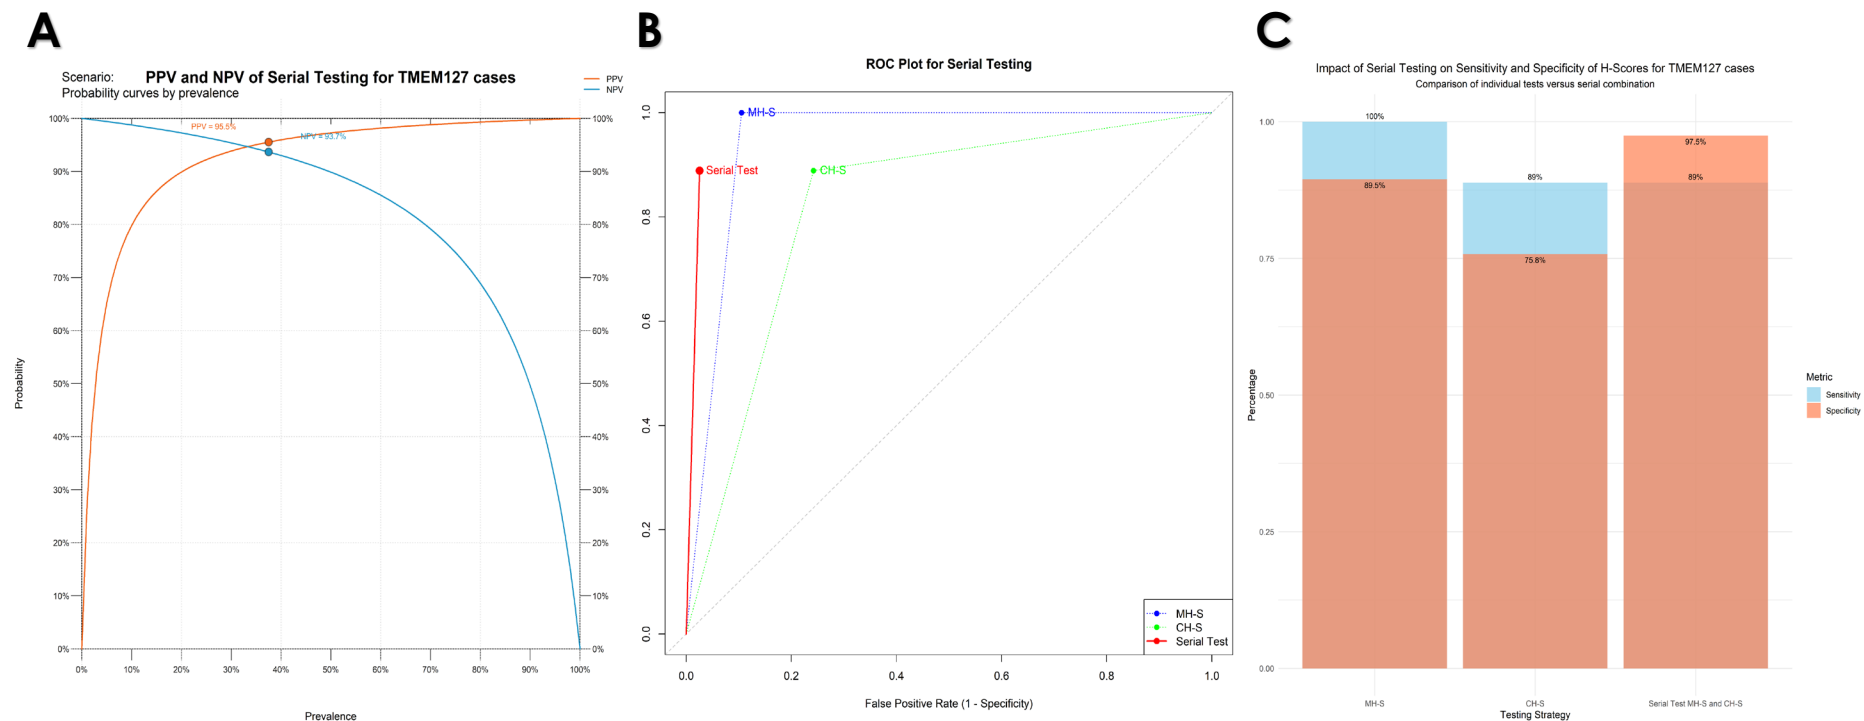

**Supplementary Figure 5: A)** Serial testing using MH-S (71) and CH-S (97) to identify *TMEM127* cases (only known pathogenic variants included in TMEM127 group). Sensitivity= Sensitivity A X Sensitivity B=.890X1= 1 X 0.890= 89%, Specificity= Spec A + Spec B – (Spec A X Spec B)= 0.758 + 0.895 – (0.758 X 0.895) =0.975 X 100 = 97.5%; **B)** Post Test Prob=0.375, PPV Serial=  $.890 \times 0.375 / (.890 \times 0.375) + [(1-.975) \times (1- 0.375)] = 0.955 \times 100 = 95.5\%$ , NPV Serial=  $.975 \times (1-0.375) / (.975 \times (1- 0.375) + [(1-.890) \times .375]) = 0.936 \times 100 = 93.6\%$ ; **C)** comparison plots of MH-S, CH-S, and Serial test
